# Supplementary material for: Clay Nanotube Immobilization on Animal Hair for Sustained Anti-Lice Protection
Source: MDPI journal article supplement (doi:10.3390/pharmaceutics13091477), 2021-09-15
Supplement: s1 [file s1]

## Supplementary Materials: Clay Nanotube Immobilization on Animal Hair for Sustained Antilice Protection

Naureen Rahman, Faith Hannah Scott, Yuri Lvov, Anna Stavitskaya, Farida Akhatova, Svetlana Konnova, Gölnur Fakhrullina, Rawil Fakhrullin

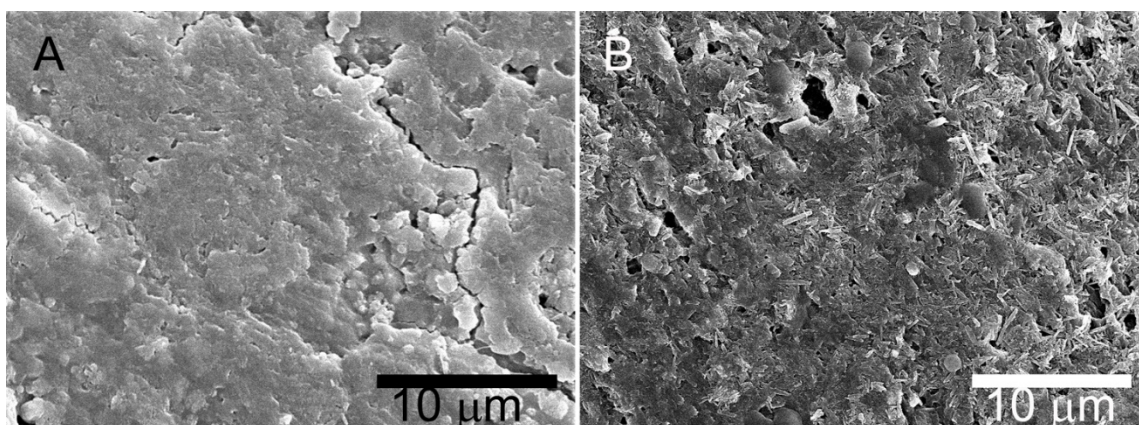

**Figure S1.** Self-assembly of halloysite clay nanotubes on acetone-washed (unwaxed) capybara hair surface: SEM images of the unwaxed capybara hair (A) and the surface is partially covered with HNTs (B).

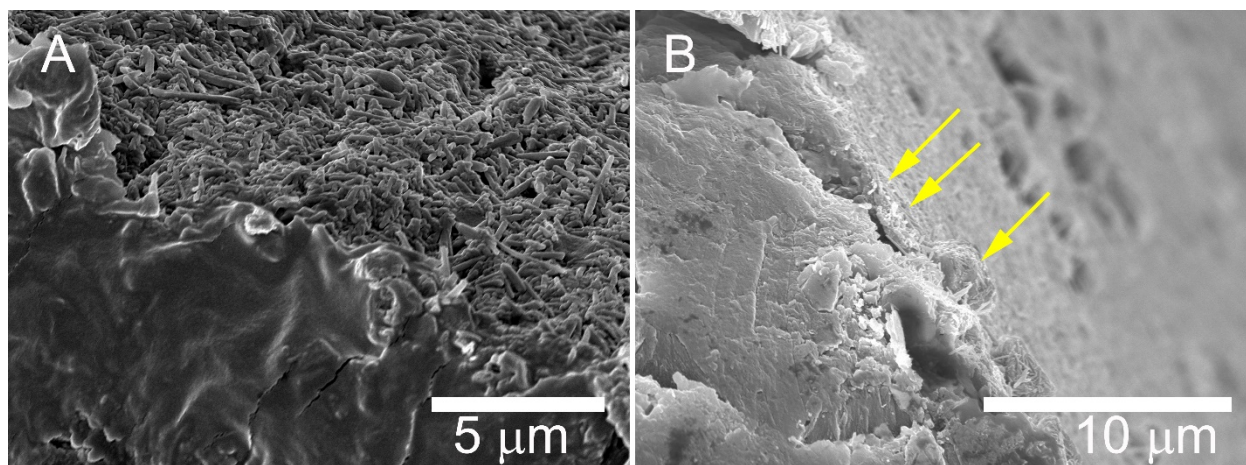

**Figure S2.** Cross-section image of halloysite coated pristine (A) and unwaxed (B) capybara hair-halloysites visible at the edges.

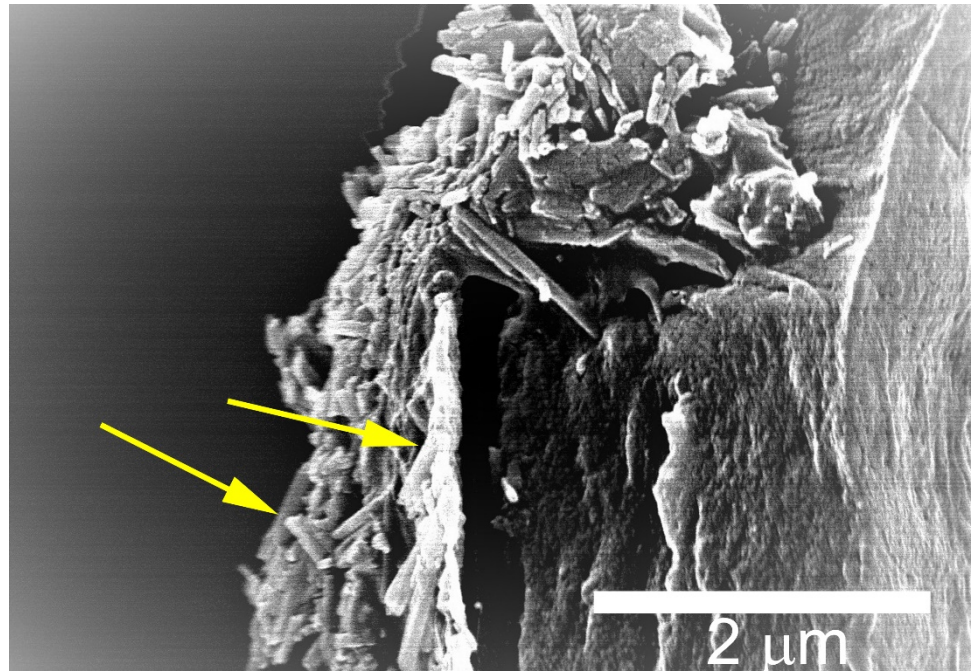

**Figure S3.** SEM cross-sectional image of halloysite coated guinea pig hair, halloysite tubes (arrowed) are visible at the edges.

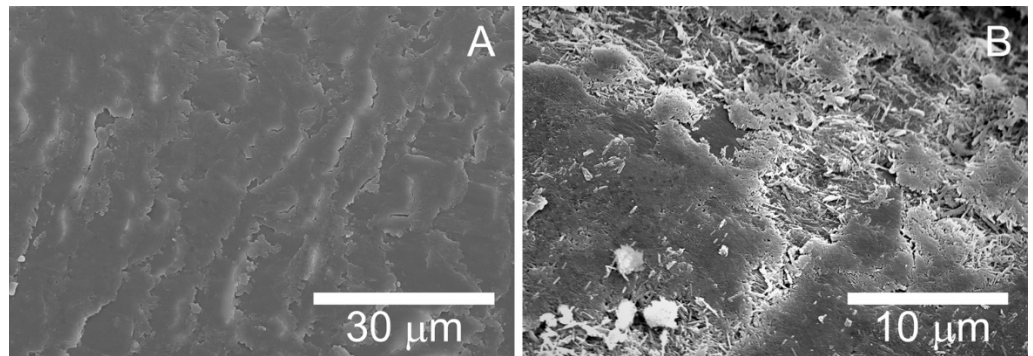

**Figure S4.** SEM images of pristine horse hair (A) and partially halloysite coated (B) horse hair.

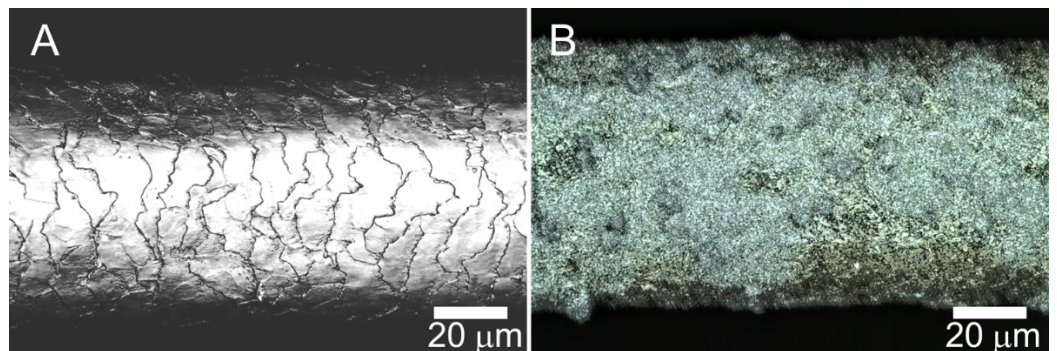

**Figure S5.** Confocal optical images of the pristine goat hair (A) and wax pre-treated goat hair coated with permethrin loaded halloysite (B).



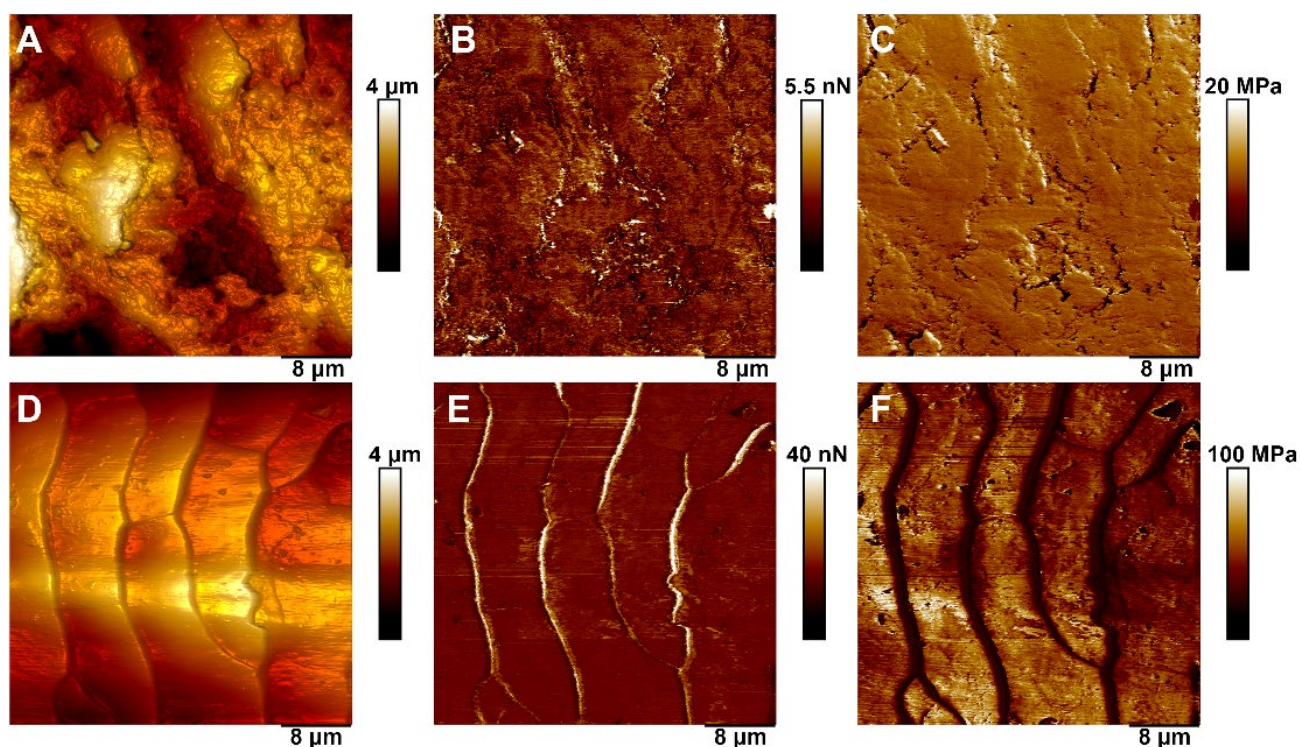

**Figure S6.** AFM images of pristine capybara (A–C) and guinea pig (D–F) hair: topography (A, D); adhesion (B, E) and Young's modulus map (C, F).

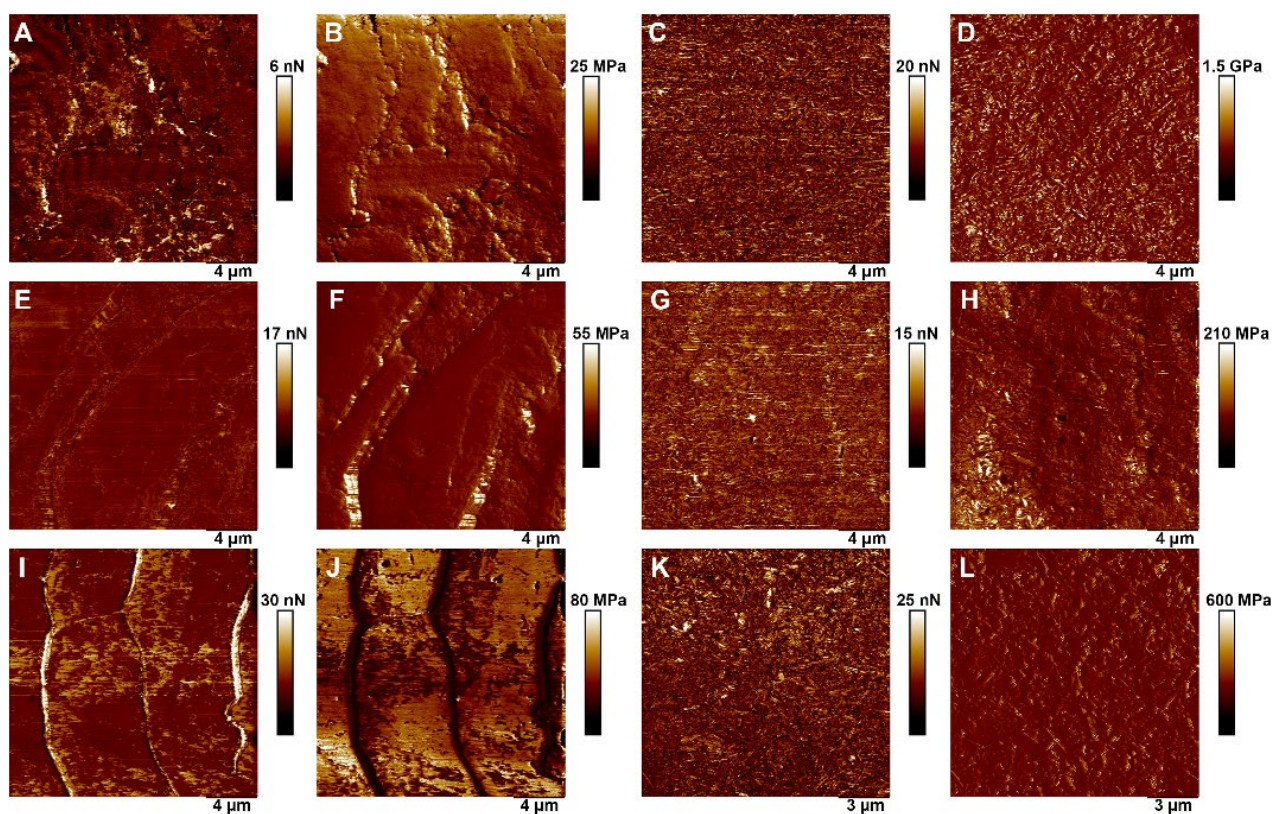

**Figure S7.** Nanomechanical characteristics (adhesion, modulus) of the capybara and guinea pig hair surface before and after coating with halloysite nanotubes: (A–B) pristine capybara hair; (E–H) unwaxed capybara hair; (I–L) guinea pig hair; (A, E, I) adhesion and (B, F, J) Young's modulus of halloysite-free capybara and guinea pig hair; (C, G, K) adhesion and (D, H, L) Young's modulus of halloysite-coated halloysite capybara and guinea pig hair.

**Table S1.** Mortality response of drug - HNT treatment after one month after 1st and 2nd hair wash.

| Experimental formulation                               | No of lice survived \ Time (h) |       |       |       |       |
|--------------------------------------------------------|--------------------------------|-------|-------|-------|-------|
|                                                        | 0                              | 4     | 8     | 16    | 24    |
| Hair treated with 0.5 % permethrin drug                | 10                             | 1 ± 1 | 1 ± 1 | 0     | 0     |
| Hair washed one time after 0.5 % permethrin treatment  | 10                             | 5 ± 2 | 2 ± 1 | 0     | 0     |
| Hair washed two times after 0.5 % permethrin treatment | 10                             | 7 ± 1 | 7 ± 1 | 6 ± 1 | 6 ± 1 |
| Hair coated with permethrin - HNTs, no washing         | 10                             | 2 ± 1 | 2 ± 1 | 0     | 0     |
| Hair washed one time after permethrin-HNTs treatment   | 10                             | 5     | 2 ± 1 | 0     | 0     |
| Hair washed two times after permethrin-HNTs treatment  | 10                             | 6     | 3 ± 1 | 1 ± 1 | 0     |
